# Supplementary material
Source: PubMed Central journal article supplement (PMC4994914)
Supplement: NIHMS778489-supplement-Supplementary_Material.pdf [file NIHMS778489-supplement-Supplementary_Material.pdf]

Supplementary Materials for  
**Constrained Maximum Likelihood Estimation for  
Model Calibration Using Summary-level Information  
from External Big Data Sources**

## S.1 Additional Simulation Results

### S.1.1 Simulation Results for the Logistic Model with $N = 400$

Tables S.1–S.4 provide simulation results supplementary for those of Tables 1–4 in the main text, respectively. Here, the sample size of the internal study is  $N = 400$ . All the other details are the same as the corresponding simulation studies in the main text.

### S.1.2 Simulation Results for the Probit Model and Further Data Application

Tables S.5–S.7 provide simulation results when the full model is given by the probit model. In these simulations, the reduced model is still given by a logistic model. In the *under-specification* and *missing covariate* scenarios, the parameter values of the true model  $(\beta_0, \beta_X, \beta_Z, \beta_{XZ}) = (-1, 0.4, 0.4, 0.2)$ ; in the measurement error scenario, they are  $(\beta_0, \beta_Z) = (-1, 0.4)$ . Such specifications lead to a population disease prevalence around 20%. All the other details are the same as the simulation studies in the main text.

### S.1.3 Further Data Applications

Table S.8 presents further analysis results of BCDDP plus BPC3 data. In this analysis, the CML and GR methods are implemented assuming that the external model parameters come from a dataset that is so large that uncertainty can be ignored.

Table S.1: Simulation results for the *under-specification* setting; results multiplied by  $10^3$  are presented, and the coverage probabilities (CP) are reported as percents

|                          | $\beta_0$ |            |       | $\beta_X$ |            |      | $\beta_Z$ |            |      | $\beta_{XZ}$ |            |       |
|--------------------------|-----------|------------|-------|-----------|------------|------|-----------|------------|------|--------------|------------|-------|
|                          | Int       | GR/<br>mGR | CML   | Int       | GR/<br>mGR | CML  | Int       | GR/<br>mGR | CML  | Int          | GR/<br>mGR | CML   |
| simple random; $N = 400$ |           |            |       |           |            |      |           |            |      |              |            |       |
| Bias                     | -25.4     | -5.56      | -6.12 | 9.87      | 4.97       | 5.53 | 15.2      | 4.69       | 5.34 | -0.41        | -0.24      | 1.05  |
| SE                       | 152       | 40.7       | 40.8  | 151       | 36.3       | 35.0 | 154       | 37.0       | 35.6 | 149          | 151        | 149   |
| ESE                      | 147       | 35.9       | 37.7  | 148       | 34.8       | 34.3 | 148       | 34.5       | 34.3 | 137          | 135        | 139   |
| MSE                      | 23.6      | 1.69       | 1.70  | 22.8      | 1.34       | 1.25 | 24.0      | 1.39       | 1.30 | 22.1         | 22.7       | 22.1  |
| CP                       | 945       | 862        | 878   | 956       | 936        | 950  | 947       | 936        | 958  | 929          | 927        | 933   |
| case-control; $N = 400$  |           |            |       |           |            |      |           |            |      |              |            |       |
| Bias                     | -         | -          | -1.17 | 10.2      | 29.6       | 3.89 | 16.3      | 29.4       | 3.68 | 3.03         | 2.92       | -0.77 |
| SE                       | -         | -          | 26.9  | 121       | 18.8       | 27.4 | 120       | 19.5       | 26.8 | 116          | 117        | 114   |
| ESE                      | -         | -          | 26.1  | 117       | 20.3       | 27.7 | 117       | 20.7       | 28.0 | 114          | 114        | 112   |
| MSE                      | -         | -          | 0.72  | 14.8      | 1.23       | 0.77 | 14.8      | 1.24       | 0.73 | 13.4         | 13.6       | 12.9  |
| CP                       | -         | -          | 907   | 941       | 618        | 950  | 935       | 623        | 950  | 948          | 947        | 959   |

Int: internal-data only method

GR: generalized regression, mGR: modified GR for case-control sampling

CML: constrained maximum likelihood

ESE: estimated standard error

MSE: mean squared error

CP: coverage probability of a 95% confidence interval interval

Table S.2: Simulation results for the *missing covariate* setting; results multiplied by  $10^3$  are presented, and the coverage probabilities (CP) are reported as percents

|                          | $\beta_0$ |            |       | $\beta_X$ |            |      | $\beta_Z$ |            |      | $\beta_{XZ}$ |            |      |
|--------------------------|-----------|------------|-------|-----------|------------|------|-----------|------------|------|--------------|------------|------|
|                          | Int       | GR/<br>mGR | CML   | Int       | GR/<br>mGR | CML  | Int       | GR/<br>mGR | CML  | Int          | GR/<br>mGR | CML  |
| simple random; $N = 400$ |           |            |       |           |            |      |           |            |      |              |            |      |
| Bias                     | -25.4     | -12.3      | -12.8 | 9.87      | 2.18       | 2.05 | 15.2      | 15.8       | 14.4 | -0.41        | -0.86      | 2.18 |
| SE                       | 152       | 57.8       | 57.7  | 151       | 67.7       | 67.7 | 154       | 154        | 154  | 149          | 150        | 149  |
| ESE                      | 147       | 53.3       | 54.2  | 148       | 64.4       | 65.1 | 148       | 148        | 148  | 137          | 136        | 139  |
| MSE                      | 23.6      | 3.49       | 3.49  | 22.8      | 4.58       | 4.58 | 24.0      | 24.1       | 24.0 | 22.1         | 22.5       | 22.2 |
| CP                       | 945       | 944        | 950   | 956       | 936        | 943  | 947       | 941        | 942  | 929          | 929        | 936  |
| case-control; $N = 400$  |           |            |       |           |            |      |           |            |      |              |            |      |
| Bias                     | -         | -          | 0.85  | 10.2      | 16.2       | 2.57 | 16.3      | 16.4       | 16.5 | 3.03         | 2.47       | 2.59 |
| SE                       | -         | -          | 36.1  | 121       | 42.2       | 45.3 | 120       | 120        | 120  | 116          | 116        | 116  |
| ESE                      | -         | -          | 36.9  | 117       | 42.6       | 45.4 | 117       | 117        | 117  | 114          | 114        | 115  |
| MSE                      | -         | -          | 1.30  | 14.8      | 2.04       | 2.06 | 14.8      | 14.8       | 14.8 | 13.4         | 13.5       | 13.4 |
| CP                       | -         | -          | 952   | 941       | 914        | 947  | 935       | 936        | 936  | 948          | 945        | 961  |

Int: internal-data only method

GR: generalized regression, mGR: modified GR for case-control sampling

CML: constrained maximum likelihood

ESE: estimated standard error

MSE: mean squared error

CP: coverage probability of a 95% confidence interval

Table S.3: Simulation results for the *measurement error* setting; results presented are multiplied by  $10^3$ , and the coverage probability (CP) is in percents

|                          | $\beta_0$ |        |       | $\beta_z$ |        |      |
|--------------------------|-----------|--------|-------|-----------|--------|------|
|                          | Int       | GR/mGR | CML   | Int       | GR/mGR | CML  |
| simple random; $N = 400$ |           |        |       |           |        |      |
| Bias                     | -12.5     | -10.8  | -0.84 | 7.33      | 7.06   | 2.72 |
| SE                       | 141       | 41.8   | 25.6  | 142       | 138    | 66.5 |
| ESE                      | 139       | 38.7   | 24.4  | 137       | 131    | 61.3 |
| MSE                      | 20.1      | 1.87   | 0.66  | 20.2      | 19.2   | 4.43 |
| CP                       | 947       | 913    | 952   | 954       | 942    | 912  |
| case-control; $N = 400$  |           |        |       |           |        |      |
| Bias                     | -         | -      | 1.01  | 8.33      | 7.99   | 7.13 |
| SE                       | -         | -      | 20.4  | 104       | 99.4   | 59.3 |
| ESE                      | -         | -      | 20.7  | 106       | 101    | 58.3 |
| MSE                      | -         | -      | 0.42  | 10.9      | 9.93   | 3.56 |
| CP                       | -         | -      | 955   | 961       | 956    | 948  |

Int: internal-data only method

GR: generalized regression, mGR: modified GR for case-control sampling

CML: constrained maximum likelihood

ESE: estimated standard error

MSE: mean squared error

CP: coverage probability of a 95% confidence interval.

Table S.4: Simulation results for the *missing covariate* setting when the covariate distributions are different between internal and external populations; results multiplied by  $10^3$  are presented, and the coverage probabilities (CP) are reported as percents

|                          | $\beta_0$ |       |       | $\beta_X$ |       |      | $\beta_Z$ |      |      | $\beta_{XZ}$ |       |       |
|--------------------------|-----------|-------|-------|-----------|-------|------|-----------|------|------|--------------|-------|-------|
|                          | Int       | CML   | SCML  | Int       | CML   | SCML | Int       | CML  | SCML | Int          | CML   | SCML  |
| simple random; $N = 400$ |           |       |       |           |       |      |           |      |      |              |       |       |
| Bias                     | -15.0     | -38.0 | -8.16 | 19.1      | -80.1 | 8.02 | 9.79      | 8.24 | 6.10 | -9.96        | -5.68 | -13.4 |
| SE                       | 149       | 55.6  | 42.8  | 150       | 62.9  | 50.3 | 147       | 147  | 144  | 147          | 149   | 143   |
| ESE                      | 147       | 55.2  | 44.4  | 147       | 64.6  | 50.2 | 147       | 148  | 145  | 136          | 137   | 136   |
| MSE                      | 22.5      | 4.53  | 1.90  | 22.9      | 10.4  | 2.60 | 21.7      | 21.8 | 20.7 | 21.8         | 22.1  | 20.5  |
| CP                       | 948       | 950   | 940   | 952       | 843   | 900  | 948       | 945  | 950  | 925          | 933   | 938   |
| Bias                     | -         | -26.3 | -6.42 | 15.6      | -86.0 | 4.02 | 6.48      | 8.02 | 6.09 | 2.27         | -4.45 | -3.37 |
| SE                       | -         | 37.9  | 39.1  | 122       | 45.0  | 44.3 | 119       | 119  | 117  | 117          | 118   | 116   |
| ESE                      | -         | 37.3  | 38.6  | 117       | 45.7  | 44.3 | 117       | 116  | 115  | 115          | 112   | 114   |
| MSE                      | -         | 2.13  | 1.57  | 15.2      | 9.42  | 1.98 | 14.2      | 14.2 | 13.8 | 13.7         | 13.9  | 13.5  |
| CP                       | -         | 934   | 939   | 945       | 542   | 920  | 944       | 937  | 944  | 948          | 943   | 953   |

Int: internal-data only method

CML: constrained maximum likelihood method

SCML: synthetic constrained maximum likelihood method

ESE: estimated standard error

MSE: mean squared error

CP: coverage probability of a 95% confidence interval

Table S.5: Simulation results for the *under-specification* setting; results multiplied by  $10^3$  are presented, and the coverage probabilities (CP) are reported in percents

|                           | $\beta_0$ |       |       | $\beta_x$ |      |      | $\beta_z$ |      |      | $\beta_{xz}$ |       |       |
|---------------------------|-----------|-------|-------|-----------|------|------|-----------|------|------|--------------|-------|-------|
|                           | Int       | GR    | CML   | Int       | GR   | CML  | Int       | GR   | CML  | Int          | GR    | CML   |
| simple random; $N = 400$  |           |       |       |           |      |      |           |      |      |              |       |       |
| Bias                      | -17.1     | -5.45 | -4.81 | 11.9      | 5.12 | 4.22 | 13.9      | 8.17 | 7.08 | -2.03        | -3.35 | -1.96 |
| SE                        | 89.2      | 18.6  | 18.3  | 93.6      | 26.9 | 23.4 | 92.1      | 270  | 23.7 | 98.4         | 100   | 99.4  |
| ESE                       | 86.3      | 16.2  | 16.4  | 89.5      | 24.5 | 23.7 | 89.3      | 245  | 23.7 | 87.4         | 84.9  | 91.6  |
| MSE                       | 8.25      | 0.37  | 0.36  | 8.90      | 0.75 | 0.57 | 8.68      | 0.79 | 0.61 | 9.69         | 0.79  | 0.61  |
| CP                        | 930       | 927   | 856   | 938       | 925  | 962  | 946       | 912  | 960  | 917          | 900   | 935   |
| simple random; $N = 1000$ |           |       |       |           |      |      |           |      |      |              |       |       |
| Bias                      | -3.78     | -1.44 | -1.18 | 2.94      | 1.10 | 0.75 | 1.78      | 3.46 | 3.51 | 0.09         | 0.19  | 0.31  |
| SE                        | 53.5      | 10.7  | 10.7  | 59.4      | 15.0 | 13.7 | 56.6      | 15.2 | 13.6 | 59.0         | 58.7  | 59.0  |
| ESE                       | 53.6      | 10.0  | 9.93  | 55.9      | 14.4 | 13.5 | 55.9      | 14.4 | 13.4 | 55.9         | 55.1  | 57.1  |
| MSE                       | 2.88      | 0.12  | 0.12  | 3.53      | 0.22 | 0.19 | 3.21      | 0.23 | 0.20 | 3.47         | 3.44  | 3.47  |
| CP                        | 95.2      | 90.6  | 88.0  | 93.5      | 94.1 | 95.6 | 95.6      | 93.3 | 94.1 | 93.9         | 93.6  | 95.0  |

Int: internal-data only method

CML: constrained maximum likelihood

ESE: estimated standard error

MSE: mean squared error

CP: coverage probability of 95% confidence interval

Table S.6: Simulation results for the *missing covariate* setting; results multiplied by  $10^3$  are presented, and the coverage probabilities (CP) are reported in percents

|                           | $\beta_0$ |       |       | $\beta_X$ |      |      | $\beta_Z$ |      |      | $\beta_{XZ}$ |       |       |
|---------------------------|-----------|-------|-------|-----------|------|------|-----------|------|------|--------------|-------|-------|
|                           | Int       | GR    | CML   | Int       | GR/  | CML  | Int       | GR   | CML  | Int          | GR    | CML   |
| simple random; $N = 400$  |           |       |       |           |      |      |           |      |      |              |       |       |
| Bias                      | -17.1     | -8.95 | -8.50 | 11.9      | 3.66 | 2.03 | 13.9      | 15.5 | 14.4 | -2.03        | -3.33 | -0.95 |
| SE                        | 89.2      | 37.7  | 37.6  | 93.6      | 44.3 | 43.0 | 92.1      | 92.8 | 92.6 | 98.4         | 99.1  | 99.6  |
| ESE                       | 86.3      | 35.9  | 36.3  | 89.5      | 42.4 | 42.7 | 89.3      | 88.8 | 92.2 | 87.4         | 86.4  | 92.2  |
| MSE                       | 8.25      | 1.50  | 1.49  | 8.90      | 1.97 | 1.85 | 8.68      | 8.84 | 8.77 | 9.69         | 9.82  | 9.91  |
| CP                        | 930       | 946   | 952   | 938       | 929  | 948  | 946       | 939  | 947  | 917          | 909   | 938   |
| simple random; $N = 1000$ |           |       |       |           |      |      |           |      |      |              |       |       |
| Bias                      | -3.78     | -1.77 | -1.42 | 2.94      | 2.29 | 1.75 | 1.78      | 2.33 | 1.87 | 0.09         | 0.01  | 0.66  |
| SE                        | 53.5      | 21.6  | 21.6  | 59.4      | 26.5 | 25.9 | 56.6      | 56.8 | 56.7 | 59.0         | 58.7  | 59.2  |
| ESE                       | 53.6      | 21.6  | 21.6  | 55.9      | 25.6 | 25.5 | 55.9      | 55.7 | 56.1 | 55.9         | 55.6  | 57.2  |
| MSE                       | 2.88      | 0.47  | 0.47  | 3.53      | 0.71 | 0.67 | 3.21      | 3.23 | 3.21 | 3.47         | 3.44  | 3.50  |
| CP                        | 95.2      | 95.1  | 95.0  | 93.5      | 93.3 | 94.5 | 95.6      | 95.9 | 95.9 | 93.9         | 93.8  | 94.7  |

Int: internal-data only method

GR: generalized regression

CML: constrained maximum likelihood

ESE: estimated standard error

MSE: mean squared error

CP: coverage probability of 95% confidence interval

Table S.7: Simulation results for the *measurement error* setting; results multiplied by  $10^3$  are presented, and the coverage probability (CP) is in percents

|                           | $\beta_0$ |       |       | $\beta_Z$ |       |      |
|---------------------------|-----------|-------|-------|-----------|-------|------|
|                           | Int       | GR    | CML   | Int       | GR    | CML  |
| simple random; $N = 400$  |           |       |       |           |       |      |
| Bias                      | -6.04     | -7.13 | -1.59 | 5.10      | 5.00  | 2.57 |
| SE                        | 82.2      | 34.7  | 27.6  | 83.8      | 82.0  | 58.7 |
| ESE                       | 80.0      | 32.9  | 26.2  | 81.5      | 77.9  | 55.0 |
| MSE                       | 6.79      | 1.26  | 0.77  | 7.05      | 6.74  | 3.45 |
| CP                        | 942       | 936   | 946   | 945       | 944   | 916  |
| simple random; $N = 1000$ |           |       |       |           |       |      |
| Bias                      | -0.51     | -2.11 | -0.48 | -0.45     | -0.05 | 0.90 |
| SE                        | 51.1      | 21.2  | 16.5  | 52.4      | 50.0  | 35.7 |
| ESE                       | 50.3      | 20.6  | 16.5  | 51.2      | 49.2  | 34.9 |
| MSE                       | 2.61      | 0.45  | 0.27  | 2.74      | 2.50  | 1.28 |
| CP                        | 95.7      | 93.8  | 94.8  | 94.9      | 95.4  | 94.4 |

Int: internal-data only method

GR: generalized regression

CML: constrained maximum likelihood

ESE: estimated standard error

MSE: mean squared error

CP: coverage probability of 95% confidence interval



Table S.8: Analysis results of BCDDP data assuming that the uncertainty associated with the parameters in the external mmodel ( $\theta$ ) can be ignored. The variables in the model include: number of first-degree relatives with breast cancer (numrel), age at menarche (two dummy variables agemen1–agemen2), age at first live birth (three dummy variables ageflb1–ageflb3), weight, number of previous biopsies (nbiops), and mammographic density (MD)†

|          | Internal data  | mGR            | CML            |
|----------|----------------|----------------|----------------|
| variable | Est. (SE)      | Est. (SE)      | Est. (SE)      |
| numrel   | 0.648 (0.090)  | 0.346 (0.030)  | 0.297 (0.020)  |
| agemen1  | 0.083 (0.091)  | 0.079 (0.019)  | 0.077 (0.019)  |
| agemen2  | 0.468 (0.124)  | 0.167 (0.028)  | 0.167 (0.028)  |
| ageflb1  | -0.018 (0.146) | -0.117 (0.030) | -0.117 (0.031) |
| ageflb2  | 0.086 (0.144)  | -0.005 (0.033) | -0.005 (0.033) |
| ageflb3  | 0.251 (0.137)  | 0.165 (0.040)  | 0.163 (0.040)  |
| weight   | 0.020 (0.004)  | 0.022 (0.002)  | 0.024 (0.001)  |
| nbiops   | 0.180 (0.070)  | 0.178 (0.069)  | 0.165 (0.073)  |
| MD       | 0.430 (0.044)  | 0.428 (0.045)  | 0.441 (0.043)  |

†: adjusted for 5-year age strata

mGR: modified GR for case-control sampling

CML: constrained likelihood method

Est.: estimated coefficient

SE: estimated standard error

## S.2 The Score Function and Negative Hessian Matrix for Pseudo-Loglikelihood

### S.2.1 Simple Random Sampling Design

Let  $s_\beta(Y, X, Z) = \partial \log\{f_\beta(Y|X, Z)\} / \partial \beta$  be the score function of the likelihood for the full model  $f_\beta(\cdot)$ . Based on the pseudo-loglikelihood (equation (4) in the main text) for the constrained likelihood, the score function for  $(\beta, \lambda)$  of the pseudo-loglikelihood can be obtained as

$$s_\beta^* = \frac{\partial l_{\beta, \lambda}^*}{\partial \beta} = \sum_{i=1}^N s_\beta(Y_i, X_i, Z_i) + \tilde{s}_\beta(X_i, Z_i) \equiv \sum_{i=1}^N s_\beta^*(Y_i, X_i, Z_i),$$

with

$$\tilde{s}_\beta(X_i, Z_i) = \frac{c_\beta(X_i, Z_i; \theta)\lambda}{1 - \lambda^T u_\beta(X_i, Z_i; \theta)}, \quad (\text{S.1})$$

$$c_\beta(x, z; \theta) = \int_Y s_\beta(Y, x, z) U^T(Y, x, \theta) f_\beta(Y|x, z) dY, \quad (\text{S.2})$$

and

$$s_\lambda^* = \frac{\partial l_{\beta, \lambda}^*}{\partial \lambda} = \sum_{i=1}^N \frac{u_\beta(X_i, Z_i; \theta)}{1 - \lambda^T u_\beta(X_i, Z_i; \theta)} \equiv \sum_{i=1}^N s_\lambda^*(X_i, Z_i). \quad (\text{S.3})$$

The estimator  $(\hat{\beta}, \hat{\lambda})$  for  $(\beta, \lambda)$  is obtained as the solution to  $\{s_\beta^{*T}, s_\lambda^{*T}\}^T = 0$ .

Let

$$i_{\beta\beta}(Y, X, Z) = -\partial^2 \log\{f_\beta(Y|X, Z)\} / \partial \beta \partial \beta^T, \quad (\text{S.4})$$

and  $d_{\beta\beta}(Y, X, Z) = i_{\beta\beta}(Y, X, Z) - s_\beta(Y, X, Z)^{\otimes 2}$ , with  $A^{\otimes 2} = AA^T$  for a vector  $A$ . The negative Hessian matrix  $I^* = -\partial^2 l_{\beta, \lambda}^* / \partial(\beta^T, \lambda^T)^T \partial(\beta^T, \lambda^T)$  derived from the pseudo-loglikelihood is given by the following expressions for the component matrices:

$$\begin{aligned} I_{\beta\beta}^* &= -\frac{\partial^2 l_{\beta, \lambda}^*}{\partial \beta \partial \beta^T} \\ &= \sum_{i=1}^N i_{\beta\beta}(Y_i, X_i, Z_i) + \frac{d_\beta(X_i, Z_i; \theta)}{1 - \lambda^T u_\beta(X_i, Z_i; \theta)} - \tilde{s}_\beta(X_i, Z_i)^{\otimes 2}, \end{aligned}$$

where

$$d_\beta(x, z; \theta) = \int_Y \lambda^T U(Y|x, \theta) d_{\beta\beta}(Y, x, z) f_\beta(Y|x, z) dY; \quad (\text{S.5})$$

$$\begin{aligned} I_{\beta\lambda}^* = I_{\beta\lambda}^{*T} &= -\frac{\partial^2 l_{\beta, \lambda}^*}{\partial \beta \partial \lambda^T} \\ &= -\sum_{i=1}^N \left\{ \frac{c_\beta(X_i, Z_i; \theta)}{1 - \lambda^T u_\beta(X_i, Z_i; \theta)} + \tilde{s}_\beta(X_i, Z_i) s_\lambda^{*T}(X_i, Z_i) \right\}; \end{aligned}$$

and

$$I_{\lambda\lambda}^* = -\frac{\partial^2 l_{\beta, \lambda}^*}{\partial \lambda \partial \lambda^T} = -\sum_{i=1}^N s_\lambda^*(X_i, Z_i)^{\otimes 2}.$$

## S.2.2 Case-Control Sampling Design

As defined in equation (8) in the main text,

$$p_{\beta,\alpha}(y|x, z) = \frac{\mu_y f_{\beta}(y|x, z)}{\sum_y \mu_y f_{\beta}(y|x, z)} = \frac{\exp(\alpha y) f_{\beta}(y|x, z)}{\sum_y \exp(\alpha y) f_{\beta}(y|x, z)},$$

with  $\alpha = \log(\mu_1/\mu_0)$ . We can then rewrite the pseudo-loglikelihood (equation (6) in the main text) as

$$l_{\beta,\lambda,\alpha}^{*,cc} = \sum_{i=1}^N \log \left\{ \frac{p_{\beta,\alpha}(Y_i, X_i, Z_i)}{1 - \lambda^T u_{\beta,\alpha}(X_i, Z_i; \theta)} \right\},$$

where

$$u_{\beta,\alpha}(X, Z; \theta) = \sum_y U(y|X, \theta) \exp(-\alpha y) p_{\beta,\alpha}(y|X, Z),$$

and  $\lambda$  is redefined as  $\lambda := \lambda/\mu_0$ . With the above expression the pseudo-loglikelihood under the case-control sampling design has the same form as that under the simple random sampling (equation (4) in the main text), except that now the additional nuisance parameter  $\alpha$  appears. In fact, we can extend the results to more general settings where the internal study is performed under the stratified case-control sampling design, namely the sampling is done through strata formed by the cross-classification of the case-control status as well as levels of some covariates (or their crude surrogates). We denote by  $W$  the vector of indicators for the covariate levels defining the strata. In this general setting, the pseudo-loglikelihood takes the form

$$l_{\beta,\lambda,\alpha}^{*,cc} = \sum_{i=1}^N \log \left\{ \frac{p_{\beta,\alpha}(Y_i, X_i, Z_i)}{1 - \lambda^T u_{\beta,\alpha}(X_i, Z_i; \theta)} \right\},$$

where

$$p_{\beta,\alpha}(Y|X, Z) = \frac{\exp(YW^T \alpha) f_{\beta}(Y|X, Z)}{\sum_y \exp(yW^T \alpha) f_{\beta}(y|X, Z)} \quad (\text{S.6})$$

and

$$u_{\beta,\alpha}(X, Z; \theta) = \sum_y U(y|X, \theta) e^{-yW^T \alpha} p_{\beta,\alpha}(y|X, Z).$$

The score functions  $s_{\beta}^*$  and  $s_{\lambda}^*$  for  $(\beta, \lambda)$ , and the corresponding component submatrices  $I_{\beta\beta}^*$ ,  $I_{\beta\lambda}^*$  and  $I_{\lambda\lambda}^*$  of the negative Hessian matrix of the pseudo-loglikelihood thus have the same forms as those given in the case of simple random sampling, with  $f_{\beta}(Y|X, Z)$  now replaced by  $p_{\beta,\alpha}(Y|X, Z)$ , and  $u_{\beta}(X, Z; \theta)$  replaced by  $u_{\beta,\alpha}(X, Z; \theta)$ . The score function for the nuisance parameter  $\alpha$  is given by

$$s_{\alpha}^* = \frac{\partial l_{\beta,\lambda,\alpha}^*}{\partial \alpha} = \sum_{i=1}^N s_{\alpha}(Y_i, X_i, Z_i) + \tilde{s}_{\alpha}(X_i, Z_i) \equiv \sum_{i=1}^N s_{\alpha}^*(Y_i, X_i, Z_i),$$

where  $s_\alpha(Y, X, Z) = \partial \log\{p_{\beta,\alpha}(Y|X, Z)\}/\partial\alpha$ , and

$$\tilde{s}_\alpha(X_i, Z_i) = \frac{c_{\beta,\alpha}(X_i, Z_i; \theta)\lambda}{1 - \lambda^T u_{\beta,\alpha}(X_i, Z_i; \theta)},$$

with

$$c_{\beta,\alpha}(X, Z; \theta) = \sum_y \{s_\alpha(y, X, Z) - yW\} U^T(y|X, \theta) e^{-yW^T\alpha} p_{\beta,\alpha}(y|X, Z; \beta).$$

The component submatrices of the negative Hessian matrix corresponding to  $\alpha$  are given as

$$\begin{aligned} I_{\alpha\alpha}^* &= -\frac{\partial^2 l_{\beta,\lambda,\alpha}^{*,cc}}{\partial\alpha\partial\alpha^T} \\ &= \sum_{i=1}^N i_{\alpha\alpha}(Y_i, X_i, Z_i) + \frac{d_{\beta,\alpha}(X_i, Z_i; \theta)}{1 - \lambda^T u_{\beta,\alpha}(X_i, Z_i; \theta)} - \tilde{s}_\alpha(X_i, Z_i)^{\otimes 2}, \end{aligned}$$

where  $i_{\alpha\alpha}(Y, X, Z) = -\partial^2 \log\{p_{\beta,\alpha}(Y|X, Z)\}/\partial\alpha\partial\alpha^T$ , and

$$d_{\beta,\alpha}(x, z; \theta) = \sum_y \lambda^T U(y|x, \theta) \{d_{\alpha\alpha}(y, X, Z) - yW W^T + yW s_\alpha^T(y, X, Z)\} e^{-yW^T\alpha} p_{\beta,\alpha}(y|X, Z),$$

with  $d_{\alpha\alpha}(Y, X, Z) = i_{\alpha\alpha}(Y, X, Z) - s_\alpha(Y, X, Z)^{\otimes 2}$ ;

$$\begin{aligned} I_{\alpha\beta}^* = I_{\beta\alpha}^{*T} &= -\frac{\partial^2 l_{\beta,\lambda,\alpha}^{*,cc}}{\partial\alpha\partial\beta^T} \\ &= \sum_{i=1}^N \left\{ i_{\alpha\beta}(Y_i, X_i, Z_i) + \frac{e_{\beta,\alpha}(X_i, Z_i; \theta)}{1 - \lambda^T u_{\beta,\alpha}(X_i, Z_i; \theta)} - \tilde{s}_\alpha(X_i, Z_i) \tilde{s}_\beta^T(X_i, Z_i) \right\}, \end{aligned}$$

where  $i_{\alpha\beta}(Y, X, Z) = -\partial^2 \log\{p_{\beta,\alpha}(Y|X, Z)\}/\partial\alpha\partial\beta^T$ , and

$$e_{\beta,\alpha}(x, z; \theta) = \sum_y \lambda^T U(y|x, \theta) \{d_{\alpha\beta}(y, X, Z) + yW s_\beta^T(y, X, Z)\} e^{-yW^T\alpha} p_{\beta,\alpha}(y|X, Z),$$

with  $d_{\alpha\beta}(Y, X, Z) = i_{\alpha\beta}(Y, X, Z) - s_\alpha(Y, X, Z) s_\beta(Y, X, Z)^T$ ; and

$$\begin{aligned} I_{\alpha\lambda}^* = I_{\lambda\alpha}^{*T} &= -\frac{\partial^2 l_{\beta,\lambda,\alpha}^{*,cc}}{\partial\alpha\partial\lambda^T} \\ &= -\sum_{i=1}^N \left\{ \frac{c_{\beta,\alpha}(X_i, Z_i; \theta)}{1 - \lambda^T u_{\beta,\alpha}(X_i, Z_i; \theta)} + \tilde{s}_\alpha(X_i, Z_i) s_\lambda^{*T}(X_i, Z_i) \right\}. \end{aligned}$$

Note that in Proposition 1 we have absorbed the nuisance parameter  $\alpha$  into  $\beta$  so that the expressions provided there can be unified under both the settings of simple random and case-control designs.

### S.3 The Score Function and Negative Hessian Matrix for Synthetic Constrained Likelihood

In synthetic constrained likelihood method, the covariate distribution  $F^\dagger(X, Z)$  in the external study, different from the distribution  $F(X, Z)$  in the internal study, is estimated by a reference sample  $(X_j^\dagger, Z_j^\dagger)$ ,  $j = 1, \dots, N_r$ , where  $N_r$  is the size of the reference sample. When the internal sample is obtained under the simple random sampling design, the synthetic constrained likelihood is defined as  $l_{\beta, \lambda}^\dagger = \log(L_{\beta, F}) + \lambda^T \int u_\beta(X, Z; \theta) d\tilde{F}^\dagger(X, Z)$ , with  $\tilde{F}^\dagger$  the empirical distribution of  $(X^\dagger, Z^\dagger)$  in the reference sample, and the synthetic constrained maximum likelihood (SCML) estimator  $(\tilde{\beta}, \tilde{\lambda})$  for  $(\beta, \lambda)$  is obtained by solving the estimating equations  $\partial l_{\beta, \lambda}^\dagger / \partial \beta = 0$  and  $\partial l_{\beta, \lambda}^\dagger / \partial \lambda = 0$ . The expressions for  $s_\beta^\dagger = l_{\beta, \lambda}^\dagger / \partial \beta$  and  $s_\lambda^\dagger = l_{\beta, \lambda}^\dagger / \partial \lambda$  are:

$$\begin{aligned} s_\beta^\dagger &= \frac{\partial l_{\beta, \lambda}^\dagger}{\partial \beta} = \sum_{i=1}^N s_\beta(Y_i, X_i, Z_i) + \sum_{j=1}^{N_r} \tilde{s}_\beta^\dagger(X_j^\dagger, Z_j^\dagger), \\ \tilde{s}_\beta^\dagger(X_j, Z_j) &= c_\beta(X_j^\dagger, Z_j^\dagger; \theta)\lambda, \end{aligned} \quad (\text{S.7})$$

with  $s_\beta(Y, X, Z) = \partial \log\{f_\beta(Y|X, Z)\} / \partial \beta$  and  $c_\beta(x, z; \theta)$  defined in (S.2), and

$$s_\lambda^\dagger = \frac{\partial l_{\beta, \lambda}^\dagger}{\partial \lambda} = \sum_{j=1}^{N_r} u_\beta(X_j^\dagger, Z_j^\dagger; \theta) \equiv \sum_{j=1}^{N_r} s_\lambda^\dagger(X_j^\dagger, Z_j^\dagger). \quad (\text{S.8})$$

The component matrices for  $I^\dagger = -\partial^2 l_{\beta, \lambda}^\dagger / \partial(\beta^T, \lambda^T)^T \partial(\beta^T, \lambda^T)$  are given as

$$\begin{aligned} I_{\beta\beta}^\dagger &= -\frac{\partial^2 l_{\beta, \lambda}^\dagger}{\partial \beta \partial \beta^T} \\ &= \sum_{i=1}^N i_{\beta\beta}(Y_i, X_i, Z_i) + \sum_{j=1}^{N_r} \lambda^T d_\beta(X_j^\dagger, Z_j^\dagger; \theta), \end{aligned}$$

where  $i_{\beta\beta}(Y, X, Z) = -\partial^2 \log\{f_\beta(Y|X, Z)\} / \partial \beta \partial \beta^T$  and  $d_\beta(x, z; \theta)$  is defined in (S.5);

$$I_{\beta\lambda}^\dagger = I_{\beta\lambda}^{\dagger T} = -\frac{\partial^2 l_{\beta, \lambda}^\dagger}{\partial \beta \partial \lambda^T} = -\sum_{j=1}^{N_r} c_\beta(X_j^\dagger, Z_j^\dagger; \theta);$$

and  $I_{\lambda\lambda}^\dagger = -\partial^2 l_{\beta, \lambda}^\dagger / \partial \lambda \partial \lambda^T$  is a  $\ell \times \ell$  zero matrix with  $\ell$  the dimension of  $\lambda$ .

When the internal sample is obtained by the case-control sampling design, following Prentice and Pyke (1979), the likelihood contribution

$$L_{\beta, F}^{cc} = \prod_{i=1}^N f_\beta(Y_i | X_i, Z_i) dF(X_i, Z_i),$$

with  $dF(X_i, Z_i)$  treated nonparametrically is equivalent to the pseudo-likelihood

$$L_{\beta, \alpha}^{cc} = \prod_{i=1}^N p_{\beta, \alpha}(Y_i | X_i, Z_i),$$

with  $\alpha$  and  $p_{\beta, \alpha}(y|x, z)$  defined in equation (8) in the main text. The synthetic constrained likelihood is then defined as  $l_{\beta, \lambda, \alpha}^\dagger = \log(L_{\beta, \alpha}^{cc}) + \lambda^T \int u_\beta(X, Z; \theta) d\tilde{F}^\dagger(X, Z)$ . The nuisance parameter  $\alpha$  appears only in the likelihood contribution from the internal sample (first term in  $l_{\beta, \lambda, \alpha}^\dagger$ ) and not in the contribution from the reference sample (second term in  $l_{\beta, \lambda, \alpha}^\dagger$ ). Therefore, all the results for parameters  $\beta$  and  $\lambda$  derived under the simple random sampling design directly apply, except that in the expressions involving the likelihood contribution from the internal sample, such as  $s_\beta(Y, X, Z)$  and  $i_{\beta\beta}(Y, X, Z)$ , the quantity  $f_\beta(Y|X, Z)$  is replaced by  $p_{\beta, \alpha}(Y|X, Z)$ . The nuisance parameter  $\alpha$  is directly solved from

$$0 = s_\alpha^\dagger = \sum_{i=1}^N \frac{\partial}{\partial \alpha} \log\{p_{\beta, \alpha}(Y_i | X_i, Z_i)\} \equiv \sum_{i=1}^N s_\alpha^\dagger(Y_i, X_i, Z_i).$$

The negative Hessian matrix is now defined as  $I^\dagger = -\partial^2 l_{\beta, \lambda, \alpha}^\dagger / \partial(\beta^T, \lambda^T, \alpha^T)^T \partial(\beta^T, \lambda^T, \alpha^T)$ , where

$$I_{\alpha\alpha}^\dagger = -\frac{\partial^2 l_{\beta, \lambda, \alpha}^\dagger}{\partial \alpha \partial \alpha^T} = \sum_{i=1}^N i_{\alpha\alpha}(Y_i, X_i, Z_i),$$

with  $i_{\alpha\alpha}(Y, X, Z) = -\partial^2 \log\{p_{\beta, \alpha}(Y|X, Z)\} / \partial \alpha \partial \alpha^T$ , and

$$I_{\alpha\beta}^\dagger = -\frac{\partial^2 l_{\beta, \lambda, \alpha}^\dagger}{\partial \alpha \partial \beta^T} = \sum_{i=1}^N i_{\alpha\beta}(Y_i, X_i, Z_i),$$

with  $i_{\alpha\beta}(Y, X, Z) = -\partial^2 \log p_{\beta, \alpha}(Y|X, Z) / \partial \alpha \partial \beta^T$ . The components

$$I_{\alpha\lambda}^\dagger = I_{\lambda\alpha}^{\dagger T} = -\frac{\partial^2 l_{\beta, \lambda, \alpha}^\dagger}{\partial \alpha \partial \beta^T}$$

are zero matrices.

The extension to the stratified case-control design in the internal study, as discussed in Appendix S.2.2, is straightforward by redefining  $p_{\beta, \alpha}(Y|X, Z)$  as in (S.6), and generalizing  $\alpha$  to a vector of parameters corresponding to the levels of covariates  $W$  defining the strata.

## S.4 Conditions for the Theoretical Results

Below is the list of conditions employed in the theoretical results.

- (i) The true parameter value  $\beta_0$  is an interior point of the parameter space which is compact.
- (ii) The function  $u_\beta(x, z; \theta)$  defined in (3) in the main text is twice continuously differentiable in  $\beta$  in a neighborhood  $\mathcal{N}$  of  $\beta_0$ , and  $E\|u_\beta(X, Z; \theta)\|^3 < \infty$  in  $\mathcal{N}$ .
- (iii)  $E\{u_\beta(X, Z; \theta)u_\beta^T(X, Z; \theta)\}$  is positive definite at  $\beta = \beta_0$ , and

$$N^{-1} \sum_i u_\beta(X_i, Z_i; \theta)u_\beta^T(X_i, Z_i; \theta) \rightarrow E\{u_\beta(X, Z; \theta)u_\beta^T(X, Z; \theta)\}$$

in probability uniformly in  $\mathcal{N}$ .

- (iv)  $E\|c_\beta(X, Z; \theta)\| < \infty$  in  $\mathcal{N}$  with  $c_\beta(x, z; \theta)$  defined in (S.2).
- (v)  $E\|d_\beta(X, Z; \theta)\| < \infty$  in  $\mathcal{N}$  with  $d_\beta(x, z; \theta)$  defined in (S.5).

## S.5 Proofs of Lemmas and Propositions

### Proof of Lemma 1:

Let  $s_\beta(y, x, z) = \partial \log\{f_\beta(y|x, z)\}/\partial\beta$ , and  $i_{\beta\beta}(y, x, z) = -\partial^2 \log\{f_\beta(y|x, z)\}/\partial\beta\partial\beta^T$ . Write  $u_\beta(X_i, Z_i) = u_\beta(X_i, Z_i; \theta)$  since the value of  $\theta$  is always fixed. Consider the ball  $\mathcal{B} = \{\beta : \|\beta - \beta_0\| \leq n^{-1/k}\}$  for some integer  $k \geq 3$  such that  $\mathcal{B} \subset \mathcal{N}$ . For a fixed  $\beta$  within  $\mathcal{B}$ , let  $\lambda(\beta)$  be the solution to the  $\partial l_{\beta, \lambda}^*/\partial\lambda = 0$  or  $\partial l_{\beta, \lambda}^{*,cc}/\partial\lambda = 0$ , namely

$$\sum_{i=1}^N \frac{u_\beta(X_i, Z_i)}{1 - \lambda(\beta)^T u_\beta(X_i, Z_i)} = 0.$$

Applying Taylor expansion to the left-hand side of the above equation, we obtain

$$\begin{aligned} \lambda(\beta) &= - \left\{ N^{-1} \sum_{i=1}^N u_\beta(X_i, Z_i)u_\beta^T(X_i, Z_i) \right\}^{-1} \left\{ N^{-1} \sum_{i=1}^N u_\beta(X_i, Z_i) \right\} + o_p(N^{-1/k}) \\ &= O_p(N^{-1/k}) \end{aligned}$$

uniformly over  $\mathcal{B}$  with probability tending to one as  $N \rightarrow \infty$ . Also, by Taylor expansion, with probability one

$$\sum_{i=1}^N s_\beta(Y_i, X_i, Z_i) = - \left\{ N^{-1} \sum_{i=1}^N i_{\beta\beta}(Y_i, X_i, Z_i) \right\}^{-1} N(\beta - \beta_0) + o_p(N^{-1/k}).$$

Let  $Q(\beta) = l_{\beta, \lambda(\beta)}^*$ . By Taylor expansion again and using the results above, we have uniformly for  $\beta$  on the surface of  $\mathcal{B}$ ,

$$\begin{aligned}
& - \sum_{i=1}^N \log \{1 - \lambda^T(\beta) u_{\beta}(X_i, Z_i)\} \\
&= \sum_{i=1}^N \lambda^T(\beta) u_{\beta}(X_i, Z_i) + \sum_{i=1}^N \{\lambda^T(\beta) u_{\beta}(X_i, Z_i)\}^2 + o_p(N^{1-2/k}) \\
&= -\frac{N}{2} \left\{ N^{-1} \sum_{i=1}^N u_{\beta}(X_i, Z_i) \right\}^T \left\{ N^{-1} \sum_{i=1}^N u_{\beta_0}(X_i, Z_i) u_{\beta_0}^T(X_i, Z_i) \right\}^{-1} \left\{ N^{-1} \sum_{i=1}^N u_{\beta}(X_i, Z_i) \right\} \\
&\quad + o_p(N^{1-2/k}) \\
&= -K_1 N^{1-2/k};
\end{aligned}$$

$$\begin{aligned}
& \sum_{i=1}^N \log \{f_{\beta}(Y_1 | X_i, Z_i)\} \\
&= \sum_{i=1}^N \log \{f_{\beta_0}(Y_1 | X_i, Z_i)\} + \sum_{i=1}^N (\beta - \beta_0)^T s_{\beta}(Y_i, X_i, Z - i) \\
&\quad + \frac{N}{2} (\beta - \beta_0)^T \left\{ N^{-1} \sum_{i=1}^N i_{\beta\beta}(Y_i, X_i, Z_i) \right\}^{-1} (\beta - \beta_0) + o_p(N^{1-2/k}) \\
&= \sum_{i=1}^N \log \{f_{\beta_0}(Y_1 | X_i, Z_i)\} - \frac{N}{2} (\beta - \beta_0)^T \left\{ N^{-1} \sum_{i=1}^N i_{\beta\beta}(Y_i, X_i, Z_i) \right\}^{-1} (\beta - \beta_0) + o_p(N^{1-2/k}) \\
&= \sum_{i=1}^N \log \{f_{\beta_0}(Y_1 | X_i, Z_i)\} - K_2 N^{1-2/k},
\end{aligned}$$

where  $K_1$  and  $K_2$  are positive constants. On the other hand, it can similarly be shown that  $-\sum_i \log \{1 - \lambda^T(\beta) u_{\beta}(X_i, Z_i)\}$  evaluated at  $\beta_0$  is negative of order  $O_p(\log \log N)$ . All these results imply that  $Q(\beta)$  is maximized at  $\hat{\beta}$  in the interior of  $\mathcal{B}$ , and  $\hat{\beta}$  and  $\hat{\lambda} = \lambda(\hat{\beta})$  satisfy  $\partial l_{\beta, \lambda}^* / \partial \eta = 0$ . The proof for  $Q(\beta) = l_{\beta, \lambda(\beta)}^{*,cc}$ , i.e. for the case-control setting, is fully parallel. Proof of Proposition 1: Using the notation given in Appendix S.2,  $\hat{\eta}$  satisfies  $\sum_i s_i^*(\beta, \lambda) = 0$  with  $s_i^*(\beta, \lambda) = \{s_{\beta}^{*T}(Y_i, X_i, Z_i), s_{\lambda}^{*T}(X_i, Z_i)\}^T$ , and

$$I^*(\beta, \lambda) = - \sum_{i=1}^N \partial s_i^*(\beta, \lambda) / \partial \eta = \begin{pmatrix} I_{\beta\beta}^* & I_{\beta\lambda}^* \\ I_{\beta\lambda}^{*T} & I_{\lambda\lambda}^* \end{pmatrix}.$$

Under regularity conditions for  $f_{\beta}(y|x, z)$  and conditions (i)-(v), we have by Taylor expansion



and Lemma 1,

$$\begin{aligned} 0 = N^{-1} \sum_i s_i^*(\hat{\beta}, \hat{\lambda}) &= N^{-1} \sum_i s_i^*(\beta_0, 0) - N^{-1} I^*(\beta_0, 0)(\hat{\eta} - \eta_0) + o_p(N^{-1/2}) \\ &= N^{-1} \sum_i s_i^*(\beta_0, 0) - \mathcal{I}^*(\hat{\eta} - \eta_0) + o_p(N^{-1/2}), \end{aligned}$$

where

$$\mathcal{I}^* = \begin{pmatrix} E\{i_{\beta\beta}(Y, X, Z)\} & -E\{c_\beta(X, Z; \theta)\} \\ -E\{c_\beta^T(X, Z; \theta)\} & -E\{u_\beta(X, Z)u_\beta^T(X, Z)\} \end{pmatrix}$$

is evaluated at  $\beta = \beta_0$ , with  $i_{\beta\beta}(Y, X, Z)$ ,  $c_\beta(X, Z; \theta)$ , and  $u_\beta(X, Z; \theta)$  defined in (S.4), (S.2), and (3) of the main text, respectively. Hence,

$$\sqrt{N}(\hat{\eta} - \eta_0) = \mathcal{I}^{*-1} \sqrt{N} \left\{ N^{-1} \sum_i s_i^*(\beta_0, 0) \right\} + o_p(1).$$

By the fact that  $E\{s_{\beta_0}(Y, X, Z)\} = 0$  and  $E\{u_{\beta_0}(X, Z)\} = 0$ ,  $E\{s_i^*(\beta_0, 0)\} = 0$ . Also, from expressions given in Appendix S.2,  $\text{var}\{s_i^*(\beta_0, 0)\} = E\{s_i^*(\beta_0, 0)s_i^{*T}(\beta_0, 0)\} = \mathcal{J}^*$ , where

$$\mathcal{J}^* = \begin{pmatrix} E\{i_{\beta\beta}(Y, X, Z)\} & O \\ O & E\{u_\beta(X, Z)u_\beta^T(X, Z)\} \end{pmatrix},$$

evaluated at  $\beta = \beta_0$ . By central limit theorem we then have, as  $N \rightarrow \infty$ ,  $\sqrt{N}(\hat{\eta} - \eta_0)$  follows asymptotically the normal distribution with mean zero and covariance matrix  $\mathcal{I}^{*-1} \mathcal{J}^* \mathcal{I}^{*-1}$ . Further matrix calculation simplifies the expression for the asymptotic variance given in Proposition 1.

When the uncertainty in the parameter  $\theta$  of the external model cannot be ignored because it is estimated from a finite external sample, the variance estimator for  $\hat{\eta}$  needs to be modified to account for such additional uncertainty, which can be simply achieved using the conventional delta method. Let  $\sigma_{\eta\theta} = E\{\partial s_i^*(\beta, \lambda)/\partial \theta^T\} = E\{\partial \tilde{s}_\beta^T(X_i, Z_i)/\partial \theta, \partial s_\lambda^{*T}(X_i, Z_i)/\partial \theta\}^T$ , which can be readily obtained given the explicit formulas in (S.1) and (S.3) for  $\tilde{s}_\beta(X_i, Z_i)$  and  $s_\lambda^*(X_i, Z_i)$ . Let  $v_\theta/N_e$  be the variance of the estimate of  $\theta$ , with  $N_e$  the size of the external sample. Then, by  $\delta$ -method,  $\sqrt{N}(\hat{\eta} - \eta_0)$  has the asymptotic covariance matrix  $\mathcal{I}^{*-1}(\mathcal{J}^* + \rho \mathcal{V}^*)\mathcal{I}^{*-1}$ , where  $\mathcal{V}^* = \sigma_{\eta\theta} v_\theta \sigma_{\eta\theta}^T$  with  $\rho = \lim N/N_e$ . Accordingly, an estimator for the variance of  $\hat{\eta}$  can be obtained as

$$\hat{\mathcal{I}}^{*-1}(\hat{\mathcal{J}}^*/N + \hat{\mathcal{V}}^*/N_e)\hat{\mathcal{I}}^{*-1},$$

where  $\hat{\mathcal{A}}$  denotes the empirical analogue of  $\mathcal{A}$  evaluated at  $\hat{\eta}$ .

Proof of Lemma 2: Since the proofs for the simple random and case-control designs are essentially the same, we detail the former one only. Write  $\partial l_{\beta,\lambda}^\dagger / \partial \beta = \sum_{i=1}^N s_i^\dagger(\beta) + \sum_{j=1}^{N_r} \tilde{s}_j^\dagger(\beta, \lambda)$ , where  $s_i^\dagger(\beta) = \{s_{\beta}^{\dagger T}(Y_i, X_i, Z_i), 0^T\}^T$ , with 0 a  $\ell$ -dimensional vector of zeros, and  $\tilde{s}_j^\dagger(\beta, \lambda) = \{\tilde{s}_{\beta}^{\dagger T}(X_j^\dagger, Z_j^\dagger), s_{\lambda}^{\dagger T}(X_j^\dagger, Z_j^\dagger)\}^T$ . Explicit expressions for these functions are given in Appendix S.3. Thus  $0 = \sum_{i=1}^N s_i^\dagger(\tilde{\beta}) + \sum_{j=1}^{N_r} \tilde{s}_j^\dagger(\tilde{\beta}, \tilde{\lambda})$ .

Consider the ball  $\mathcal{B}$  contained in the neighborhood of  $\beta_0$  as defined in the proof of Lemma 1. In the following we suppress the dependence on  $\theta$  in  $c_\beta(X, Z; \theta)$  since  $\theta$  is always fixed. By Taylor expansion around the point  $(\beta^*, 0)$  with  $\beta^* \in \mathcal{B}$  and 0 a  $\ell$ -vector of zeros ( $\ell =$  dimension of  $\lambda$ ), we have

$$0 = \sum_{i=1}^N s_i^\dagger(\beta^*) + \sum_{j=1}^{N_r} \tilde{s}_j^\dagger(\beta^*, 0) - I_{\beta\beta}^\dagger(\beta - \beta^*) - I_{\beta\lambda}^{\dagger T}(\beta - \beta^*) - I_{\beta\lambda}^\dagger \lambda,$$

with  $(\beta, \lambda)$  lying between  $(\tilde{\beta}, \tilde{\lambda})$  and  $(\beta^*, 0)$ , where  $I_{\beta\beta}^\dagger$  and  $I_{\beta\lambda}^\dagger$  are negative Hessian matrices whose expressions are given in Appendix S.3, and they are evaluated at  $(\beta, \lambda)$ . Accordingly, we have

$$\begin{pmatrix} \hat{\beta} - \beta_0 \\ \hat{\lambda} \end{pmatrix} = \begin{pmatrix} H_{\beta\beta} & H_{\beta\lambda} \\ H_{\beta\lambda}^T & O \end{pmatrix}^{-1} \begin{pmatrix} \sum_{i=1}^N s_{\beta}^{\dagger T}(Y_i, X_i, Z_i) \\ \sum_{j=1}^{N_r} s_{\lambda}^{\dagger T}(X_j^\dagger, Z_j^\dagger) \end{pmatrix} + o_p(N^{-1/k}),$$

with  $H_{\beta\beta} = \sum_{i=1}^N i_{\beta\beta}(Y_i, X_i, Z_i)$  and  $H_{\beta\lambda} = -\sum_{j=1}^{N_r} c_\beta(X_j^\dagger, Z_j^\dagger)$ . So,

$$\lambda = \mathcal{H} H_{\beta\lambda}^T H_{\beta\beta}^{-1} \sum_{i=1}^N s_{\beta}^{\dagger T}(Y_i, X_i, Z_i) - \mathcal{H} \sum_{j=1}^{N_r} \tilde{s}_{\lambda}^{\dagger T}(X_j^\dagger, Z_j^\dagger),$$

with  $\mathcal{H} = (H_{\beta\lambda}^T H_{\beta\beta}^{-1} H_{\beta\lambda})^{-1}$ . As  $N \rightarrow \infty$ , the limiting value of the matrix  $\mathcal{H}$  is of order  $O_p(N_r^{-2}N)$ , and that of  $H_{\beta\lambda}^T H_{\beta\beta}^{-1}$  is  $O_p(N_r N^{-1})$  and hence  $\lambda$  is of order  $O(N^{-(1/k)} \kappa^{-1})$  with probability one uniformly for  $\beta \in \mathcal{B}$ .

Recalling the sufficient conditions for constrained maximality in the Lagrange multiplier theory, together with the condition  $q > \ell$  (Chiang and Wainwright, 1984, p. 385), we can then conclude the results of this lemma by noting that, with probability tending to one,  $\partial^2 l_{\beta,\lambda}^\dagger / \partial \beta \partial \beta^T = -I_{\beta\beta}^\dagger$  is negative definite by the fact that  $\lambda \rightarrow 0$  and the regularity condition that  $\partial^2 \log\{f_\beta(y|x, z)\} / \partial \beta \partial \beta^T$  is negative definite for  $\beta \in \mathcal{B}$ .

Proof of Proposition 2: Under the conditions specified, the Taylor expansion yields

$$0 = \sum_{i=1}^N s_i^\dagger(\beta_0) + \sum_{j=1}^{N_r} \tilde{s}_j^\dagger(\beta_0, 0) - I_{\beta\beta}^\dagger(\hat{\beta} - \beta_0) - I_{\beta\lambda}^{\dagger T}(\hat{\beta} - \beta_0) - I_{\beta\lambda}^\dagger \hat{\lambda} + o_p(N^{1/2} + N_r^{1/2}),$$

with  $I_{\beta\beta}^\dagger$  and  $I_{\beta\lambda}^\dagger$  evaluated at  $(\beta_0, 0)$ . Hence,

$$\begin{aligned} \sqrt{N} \begin{pmatrix} \hat{\beta} - \beta_0 \\ \hat{\lambda} \end{pmatrix} &= \begin{pmatrix} \frac{1}{N} \sum_{i=1}^N i_{\beta\beta}(Y_i, X_i, Z_i) & -\frac{N_r}{N} \frac{1}{N_r} \sum_{j=1}^{N_r} c_{\beta}(X_j^\dagger, Z_j^\dagger) \\ -\frac{N_r}{N} \frac{1}{N_r} \sum_{j=1}^{N_r} c_{\beta}^T(X_j^\dagger, Z_j^\dagger) & O \end{pmatrix}^{-1} \\ &\quad \times \begin{pmatrix} \frac{1}{\sqrt{N}} \sum_{i=1}^N s_{\beta}^{\dagger T}(Y_i, X_i, Z_i) \\ \sqrt{\frac{N_r}{N}} \frac{1}{\sqrt{N_r}} \sum_{j=1}^{N_r} s_{\lambda}^\dagger(X_j^\dagger, Z_j^\dagger) \end{pmatrix} + o_p(1) \\ &= \mathcal{I}^{\dagger-1} \mathcal{Z}_N + o_p(1), \end{aligned}$$

with

$$\mathcal{I}^\dagger = \begin{pmatrix} B & -\kappa C \\ -\kappa C^T & O \end{pmatrix},$$

and

$$\mathcal{Z}_N = \begin{pmatrix} \frac{1}{\sqrt{N}} \sum_{i=1}^N s_{\beta}^{\dagger T}(Y_i, X_i, Z_i) \\ \frac{\sqrt{\kappa}}{\sqrt{N_r}} \sum_{j=1}^{N_r} s_{\lambda}^\dagger(X_j^\dagger, Z_j^\dagger) \end{pmatrix},$$

which, following the fact  $E\{s_{\beta}^{\dagger T}(Y, X, Z)\} = 0$  and  $E^\dagger\{s_{\lambda}^\dagger(X^\dagger, Z^\dagger)\} = 0$ , converges in distribution to a mean-zero normal distribution with covariance matrix

$$\mathcal{J}^\dagger = \begin{pmatrix} B & O \\ O & \kappa L \end{pmatrix}.$$

Accordingly, as  $N \rightarrow \infty$ ,  $\sqrt{N}(\tilde{\eta} - \eta_0)$  follows a normal distribution with mean zero and covariance matrix  $\mathcal{I}^{\dagger-1} \mathcal{J}^\dagger \mathcal{I}^{\dagger-1}$ , which by matrix calculation reduces to the expression given in Proposition 2.

When the uncertainty in the parameter  $\theta$  of the external model needs to be accounted for, we modify the variance estimator for  $\tilde{\eta}$  using the  $\delta$ -method. Let  $\sigma_{\eta\theta}^\dagger = E\{\partial \tilde{s}_j^\dagger(\beta, \lambda) / \partial \theta^T\} = E\{\partial \tilde{s}_\beta^{\dagger T}(X_j^\dagger, Z_j^\dagger) / \partial \theta, \partial s_\lambda^{\dagger T}(X_j^\dagger, Z_j^\dagger) / \partial \theta\}^T$ , which can be readily obtained given the formulas in (S.7) and (S.8) for  $\tilde{s}_\beta^\dagger(X_j^\dagger, Z_j^\dagger)$  and  $s_\lambda^\dagger(X_j^\dagger, Z_j^\dagger)$ . Let  $v_\theta / N_e$  be the variance of the estimate of  $\theta$ , with  $N_e$  the size of the external sample. By the delta method, the asymptotic covariance matrix of  $\mathcal{Z}_N$  is

$$\mathcal{K}^\dagger = \begin{pmatrix} B & O \\ O & \kappa(L + \rho^\dagger v_\theta) \end{pmatrix},$$

where  $\rho^\dagger = \lim N_r / N_e$ . Therefore,  $\sqrt{N}(\tilde{\eta} - \eta_0)$  has the asymptotic covariance matrix  $\mathcal{I}^{\dagger-1} \mathcal{K}^\dagger \mathcal{I}^{\dagger-1}$ . Accordingly, an estimator for the variance of  $\tilde{\eta}$  can be obtained as

$$N^{-1} \tilde{\mathcal{I}}^{\dagger-1} \tilde{\mathcal{K}}^\dagger \tilde{\mathcal{I}}^{\dagger-1},$$

where  $\tilde{\mathcal{A}}$  denotes the empirical analogue of  $\mathcal{A}$  evaluated at  $\tilde{\eta}$ .

## REFERENCES

- Chiang, A. C., Wainwright, K. (1984), *Fundamental Methods of Mathematical Economics*, 3rd ed., New York: McGraw-Hill.
